# Supplementary material for: Relationships between local and regional species richness in flea communities of small mammalian hosts: saturation and spatial scale
Source: Springer Nature journal article supplement (doi:10.1007/s00436-005-0049-z), 2005-12-23
Supplement: 436_2005_49_MOESM1_ESM.pdf [file 436_2005_49_MOESM1_ESM.pdf]

**Appendix 1** Data on small mammals and fleas used in the analysis of the relationship between maximum infracommunity (MISR) and component community (CSR) species richness. \* - host species for which intraspecific analysis was carried out.

| Species                          | Number of<br>examined<br>individuals | MISR | CSR | Source                       |
|----------------------------------|--------------------------------------|------|-----|------------------------------|
| <i>Acomys cahirinus</i>          | 122                                  | 3    | 4   | Own data                     |
| <i>Acomys russatus</i>           | 27                                   | 2    | 2   | Own data                     |
| <i>Apodemus agrarius</i> *       | 2538                                 | 4    | 18  | Own data                     |
| <i>Apodemus flavicollis</i> *    | 3893                                 | 5    | 21  | Own data                     |
| <i>Apodemus uralensis</i> *      | 560                                  | 4    | 5   | Own data                     |
| <i>Apodemus sylvaticus</i>       | 73                                   | 3    | 5   | Own data                     |
| <i>Arvicanthis niloticus</i>     | 233                                  | 3    | 3   | Schwan, 1986                 |
| <i>Arvicola terrestris</i>       | 6                                    | 3    | 3   | Own data                     |
| <i>Blarina brevicauda</i>        | 9                                    | 2    | 2   | McCay and Durden, 1996       |
| <i>Chaetodipus californicus</i>  | 72                                   | 2    | 10  | Linsdale and Davis, 1956     |
| <i>Chaetodipus fallax</i>        | 13                                   | 1    | 1   | Casebeer, 1965               |
| <i>Clethrionomys glareolus</i> * | 1711                                 | 6    | 23  | Own data                     |
| <i>Crocidura leucodon</i>        | 13                                   | 3    | 5   | Own data                     |
| <i>Dipodomys agilis</i>          | 59                                   | 2    | 5   | Davis <i>et al.</i> , 2002   |
| <i>Dipodomys merriami</i>        | 189                                  | 2    | 2   | Casebeer, 1965               |
| <i>Dipodomys venustus</i>        | 14                                   | 2    | 5   | Linsdale and Davis, 1956     |
| <i>Eliomys melanurus</i>         | 9                                    | 3    | 3   | Own data                     |
| <i>Eutamias merriami</i>         | 43                                   | 2    | 11  | Linsdale and Davis, 1956     |
| <i>Gerbillurus vallinus</i>      | 4                                    | 1    | 1   | Gunders <i>et al.</i> , 1985 |
| <i>Gerbillus andersoni</i>       | 561                                  | 2    | 3   | Own data                     |
| <i>Gerbillus dasyurus</i> *      | 968                                  | 4    | 8   | Own data                     |
| <i>Gerbillus henleyi</i>         | 99                                   | 2    | 4   | Own data                     |

|                                 |      |   |    |                                   |
|---------------------------------|------|---|----|-----------------------------------|
| <i>Gerbillus nanus</i>          | 160  | 2 | 3  | Own data                          |
| <i>Gerbillus pyramidum</i>      | 108  | 2 | 3  | Own data                          |
| <i>Jaculus jaculus</i>          | 16   | 2 | 4  | Own data                          |
| <i>Lepus californicus</i>       | 7    | 3 | 4  | Linsdale and Davis, 1956          |
| <i>Meriones crassus*</i>        | 292  | 4 | 6  | Own data                          |
| <i>Micromys minutus</i>         | 16   | 2 | 4  | Own data                          |
| <i>Microtus arvalis*</i>        | 1014 | 5 | 11 | Own data                          |
| <i>Microtus californicus</i>    | 430  | 3 | 12 | Linsdale and Davis, 1956          |
| <i>Microtus canicaudus</i>      | 377  | 3 | 8  | Faulkenberry and Robbins,<br>1980 |
| <i>Microtus pennsylvanicus</i>  | 51   | 2 | 2  | Durden, 1992                      |
| <i>Microtus subterraneus*</i>   | 91   | 5 | 10 | Own data                          |
| <i>Muscardinus avellanarius</i> | 11   | 1 | 1  | Own data                          |
| <i>Myoxus glis</i>              | 4    | 4 | 4  | Own data                          |
| <i>Napaeozapus insignis</i>     | 101  | 1 | 1  | Whitaker, 1963a                   |
| <i>Neomys anomalus</i>          | 18   | 3 | 7  | Own data                          |
| <i>Neomys fodiens*</i>          | 43   | 5 | 12 | Own data                          |
| <i>Neotoma floridana</i>        | 47   | 2 | 2  | Durden <i>et al.</i> , 1997       |
| <i>Neotoma fuscipes</i>         | 253  | 5 | 14 | Linsdale and Davis, 1956          |
| <i>Oligoryzomys flavescens</i>  | 8    | 1 | 2  | Nava <i>et al.</i> , 2003         |
| <i>Otomys angoniensis</i>       | 76   | 3 | 3  | Schwan, 1986                      |
| <i>Paratomys brantsii</i>       | 14   | 3 | 3  | Roper <i>et al.</i> , 2002        |
| <i>Perognathus longimembris</i> | 62   | 1 | 1  | Casebeer, 1965                    |
| <i>Perognatus parvus</i>        | 183  | 2 | 2  | O'Farrel, 1975                    |
| <i>Peromyscus boylii</i>        | 75   | 3 | 9  | Linsdale and Davis, 1956          |
| <i>Peromyscus californicus</i>  | 279  | 4 | 10 | Linsdale and Davis, 1956          |
| <i>Peromyscus maniculatus</i>   | 112  | 3 | 10 | Linsdale and Davis, 1956          |
| <i>Peromyscus truei</i>         | 149  | 3 | 9  | Linsdale and Davis, 1956          |

|                                  |     |   |   |                                |
|----------------------------------|-----|---|---|--------------------------------|
| <i>Psammomys obesus</i>          | 26  | 3 | 4 | Own data                       |
| <i>Reithrodontomys megalotis</i> | 35  | 1 | 4 | Linsdale and Davis, 1956       |
| <i>Scapanus latimanus</i>        | 3   | 1 | 1 | Linsdale and Davis, 1956       |
| <i>Sekeetamys calurus</i>        | 32  | 2 | 3 | Own data                       |
| <i>Sigmodon hispidus</i>         | 23  | 2 | 2 | Durden <i>et al.</i> , 2000    |
| <i>Sorex alpinus</i>             | 7   | 3 | 4 | Own data                       |
| <i>Sorex araneus</i> *           | 262 | 4 | 4 | Own data                       |
| <i>Sorex cinereus</i>            | 49  | 1 | 1 | Laakkonen <i>et al.</i> , 2002 |
| <i>Sorex minutus</i>             | 106 | 1 | 2 | Own data                       |
| <i>Spermophilus beecheyi</i>     | 514 | 3 | 7 | Linsdale and Davis, 1956       |
| <i>Spermophilus richardsonii</i> | 168 | 4 | 9 | Lindsay and Galloway, 1997     |
| <i>Sylvilagus audubonii</i>      | 80  | 4 | 8 | Linsdale and Davis, 1956       |
| <i>Sylvilagus bachmani</i>       | 9   | 3 | 5 | Linsdale and Davis, 1956       |
| <i>Talpa europaea</i>            | 5   | 6 | 7 | Own data                       |
| <i>Thomomys bottae</i>           | 150 | 3 | 6 | Linsdale and Davis, 1956       |
| <i>Zapus hudsonicus</i>          | 864 | 1 | 6 | Whitaker, 1963b                |

---
