# Supplementary material for: Relationships between local and regional species richness in flea communities of small mammalian hosts: saturation and spatial scale
Source: Springer Nature journal article supplement (doi:10.1007/s00436-005-0049-z), 2005-12-23
Supplement: 436_2005_49_MOESM2_ESM.pdf [file 436_2005_49_MOESM2_ESM.pdf]

**Appendix 2** Data on number of species of small mammals and fleas from the 38 regions used in the analyses of the relationship between component and regional flea species richness

| Region                                           | Number of species |       | Source                        |
|--------------------------------------------------|-------------------|-------|-------------------------------|
|                                                  | Hosts             | Fleas |                               |
| Idaho                                            | 15                | 31    | Allred 1968                   |
| Central California                               | 19                | 22    | Linsdale and Davis 1956       |
| Southwestern California                          | 9                 | 17    | Davis et al 2002              |
| Northern New Mexico                              | 29                | 34    | Morlan 1955                   |
| Slovakia                                         | 20                | 22    | Own data                      |
| Sweden                                           | 9                 | 12    | Brinck 1966                   |
| Volga-Kama region Russia                         | 20                | 31    | Nazarova 1981                 |
| Taimyr peninsula northern Siberia                | 14                | 11    | Sapegina et al. 1980a, 1981a  |
| Novosibirsk region southern Siberia              | 19                | 28    | Violovich 1969                |
| Kurgan region southwestern Siberia               | 19                | 17    | Starikov and Sapegina 1987    |
| Krasnojarsk region central Siberia               | 13                | 20    | Ravkin and Sapegina 1990      |
| Tomsk and Tumen regions western Siberia          | 30                | 25    | Sapegina et al. 1980b         |
| Altai mountains Russia                           | 24                | 10    | Sapegina et al. 1981b         |
| Western Sayan ridge southern Siberia             | 15                | 29    | Emelyanova and Shtilmark 1967 |
| Tuva Russia                                      | 13                | 28    | Letov et al. 1966             |
| Selenga region central Siberia                   | 9                 | 13    | Pauller et al. 1966           |
| Central Yakutia Russia                           | 6                 | 17    | Elshanskaya and Popov 1972    |
| Amur river valley southern Russian Far East      | 9                 | 22    | Koshkin 1966                  |
| Ussury river valley southern Russian Far East    | 9                 | 21    | Kozlovskaya 1958              |
| Khasan lake region southernmost Russian Far East | 9                 | 12    | Leonov 1958                   |
| Magadan and Tchukotka region northern Far East   | 15                | 16    | Yudin et al. 1976             |

Russian Asian Far East

|                                              |    |    |                              |
|----------------------------------------------|----|----|------------------------------|
| Kamchatka peninsula eastern Russian Far East | 4  | 8  | Paramonov et al. 1966        |
| Kabarda northern Caucasus                    | 9  | 21 | Syrvacheva 1964              |
| Adzharia southern Caucasus                   | 12 | 20 | Alania et al. 1964           |
| Southwestern Azerbaijan                      | 14 | 23 | Kunitsky and Kunitskaya 1962 |
| Turkmenistan                                 | 18 | 42 | Zagniborodova 1960           |
| Kustanai region northwestern Kazakhstan      | 17 | 19 | Reshetnikova 1959            |
| Akmolinsk region northern Kazakhstan         | 19 | 26 | Mikulin 1959a                |
| Pavlodar region eastern Kazakhstan           | 16 | 14 | Sineltshikov 1956            |
| Moyynkum desert southern Kazakhstan          | 18 | 32 | Popova 1968                  |
| East Balkhash desert Kazakhstan              | 22 | 39 | Mikulin 1959b                |
| Dzhungarskyi Alatau ridge Kazakhstan         | 15 | 23 | Burdelova 1996               |
| Tarbagatai ridge eastern Kazakhstan          | 23 | 37 | Mikulin 1958                 |
| Kyrgyz ridge northern Kyrgyzstan             | 16 | 36 | Shwartz et al. 1958          |
| Gissar ridge Tajikistan                      | 8  | 25 | Morozkina et al. 1971        |
| Northwestern Khangay region Mongolia         | 21 | 44 | Labunets 1967                |
| Central Khangay region Mongolia              | 9  | 23 | Vasiliev 1966                |
| Nepal                                        | 18 | 24 | Smit 1974                    |

---
