# Supplementary material for: Relationships between local and regional species richness in flea communities of small mammalian hosts: saturation and spatial scale
Source: Springer Nature journal article supplement (doi:10.1007/s00436-005-0049-z), 2005-12-23
Supplement: 436_2005_49_MOESM3_ESM.pdf [file 436_2005_49_MOESM3_ESM.pdf]

**Appendix 3** Data on small mammals and fleas used in the analysis of the relationship between maximum component community (MCSR) and regional (RSR) species richness.

| Species                        | Number of<br>examined<br>individuals | MCSR | RSR | Number of regions<br>where a host species<br>occurs |
|--------------------------------|--------------------------------------|------|-----|-----------------------------------------------------|
| <i>Allactaga elater</i>        | 1397                                 | 21   | 30  | 5                                                   |
| <i>Apodemus agrarius</i>       | 7438                                 | 15   | 47  | 10                                                  |
| <i>Apodemus peninsulae</i>     | 616                                  | 16   | 20  | 6                                                   |
| <i>Apodemus sylvaticus</i>     | 5919                                 | 17   | 34  | 4                                                   |
| <i>Apodemus uralensis</i>      | 4621                                 | 19   | 47  | 9                                                   |
| <i>Arvicola terrestris</i>     | 2481                                 | 17   | 33  | 13                                                  |
| <i>Clethrionomys glareolus</i> | 20859                                | 24   | 37  | 9                                                   |
| <i>Clethrionomys rufocanus</i> | 1734                                 | 17   | 29  | 8                                                   |
| <i>Clethrionomys rutilus</i>   | 6589                                 | 22   | 46  | 13                                                  |
| <i>Cricetulus migratorius</i>  | 907                                  | 18   | 46  | 10                                                  |
| <i>Cricetus cricetus</i>       | 78                                   | 8    | 13  | 4                                                   |
| <i>Eutamias sibiricus</i>      | 591                                  | 10   | 12  | 9                                                   |
| <i>Meriones meridianus</i>     | 36221                                | 25   | 39  | 5                                                   |
| <i>Micromys minutus</i>        | 209                                  | 5    | 14  | 5                                                   |
| <i>Microtus agrestis</i>       | 456                                  | 13   | 16  | 8                                                   |
| <i>Microtus arvalis</i>        | 6782                                 | 19   | 41  | 13                                                  |
| <i>Microtus gregalis</i>       | 572                                  | 13   | 27  | 8                                                   |
| <i>Microtus oeconomus</i>      | 1640                                 | 10   | 28  | 16                                                  |
| <i>Mus musculus</i>            | 5228                                 | 30   | 34  | 15                                                  |
| <i>Neomys fodiens</i>          | 258                                  | 7    | 16  | 10                                                  |
| <i>Peromyscus maniculatus</i>  | 2753                                 | 21   | 33  | 4                                                   |
| <i>Rattus norvegicus</i>       | 2981                                 | 13   | 23  | 4                                                   |
| <i>Sicista betulina</i>        | 647                                  | 11   | 16  | 6                                                   |

|                               |       |    |    |    |
|-------------------------------|-------|----|----|----|
| <i>Sorex araneus</i>          | 10300 | 20 | 32 | 11 |
| <i>Sorex caecutiens</i>       | 707   | 9  | 9  | 4  |
| <i>Sorex minutus</i>          | 1024  | 10 | 12 | 4  |
| <i>Spermophilus undulatus</i> | 3784  | 18 | 24 | 5  |
| <i>Talpa europaea</i>         | 244   | 13 | 14 | 4  |

---
