# Supplementary material for: Relationships between local and regional species richness in flea communities of small mammalian hosts: saturation and spatial scale
Source: Springer Nature journal article supplement (doi:10.1007/s00436-005-0049-z), 2005-12-23
Supplement: 436_2005_49_MOESM4_ESM.pdf [file 436_2005_49_MOESM4_ESM.pdf]

## References for Appendices

- Alania II, Rostigaev BA, Shiranovich PI, Dzneldze MT (1964) Data on the flea fauna of Adzharia. Proc Armenian Anti-Plague Station 3:407-435 (in Russian)
- Allred DM (1968) Fleas of the National Reactor Testing Station. Great Basin Nat 28:73-87
- Brinck G (1966) Siphonaptera from small mammals in natural foci of tick-borne encephalitis virus in Sweden. Opusc Entomol 31:156-170
- Burdelova NV (1996) Flea fauna of some small mammals in Dzhungarskyi Alatau. In: Burdelov LA (ed) Proceeding of the conference "Ecological aspects of epidemiology and epizootology of plague and other dangerous diseases" Middle Asian Sci Anti-Plague Inst, Almaty, Kazakhstan, pp. 119-120 (in Russian)
- Casebeer RS (1965) Seasonal fluctuations in ectoparasite populations of desert rodents. I. Siphonaptera. Bull Southern California Acad Sci 64:75-88
- Davis RM, Smith RT, Madon MB, Sitko-Cleugh E (2002) Flea, rodent and plague ecology at Chichupate Campground, Ventura County, California. J Vector Ecol 27:107-127
- Durden LA (1992) Parasitic arthropods of sympatric meadow voles and white-footed mice at Fort Detrick, Maryland. J Med Entomol 29:761-766
- Durden LA, Banks CW, Clark KL, Belbey BV, Oliver JH (1997) Ectoparasite fauna of the eastern woodrat, *Neotoma floridana*: Composition, origin, and comparison with ectoparasite faunas of western woodrat species. J Parasitol 83:374-381
- Durden LA, Hu RJ, Oliver JH, Cilek JE (2000) Rodent ectoparasites from two locations in northwestern Florida. J Vector Ecol 25:222-228

- Elshanskaya NI, Popov MN (1972) Zoologico-parasitological characteristics of the river Kenkeme valley (Central Yakutia). In: Kolosova LD, Lukyanova IV (eds) Theriology, Volume 1. Nauka Publ. House Siberian Branch, Novosibirsk, USSR, pp. 368-372 (in Russian)
- Emelyanova ND, Shtilmark FR (1967) Fleas of insectivores, rodents and lagomorphs of the central part of Western Sayan. Proc Irkutsk State Sci Anti-Plague Inst Siberia Far East 27:241-253 (in Russian)
- Faulkenberry GD, Robbins RG (1980) Statistical measures of interspecific association between fleas of the gray-tailed vole, *Microtus canicaudus*, Miller. Entomol News 91:93-101
- Gunders AE, Segerman J, Coetzee CG, Rautenbach IL, Schlitter DA (1985) Fleas - a new host record for *Gerbillurus vallinus* (Thomas). J Entomol Soc South Africa 48:214
- Koshkin SM (1966) Data on the flea fauna in the Sovetskaya Gavan. Proc Irkutsk State Sci Anti-Plague Inst Siberia Far East 26:242-248 (in Russian)
- Kozlovskaya OL (1958) Flea (Aphaniptera) fauna of rodents from of the river Ussury valley in the Khabarovks region. Proc Irkutsk State Sci Anti-Plague Inst Siberia Far East 17:109-116 (in Russian)
- Kunitsky VN, Kunitskaya NT (1962) Fleas of the southwestern Azerbaijan. Proc Azerbaijanian Anti-Plague Station 3:156-169 (in Russian)
- Laakkonen J, Henttonen H, Hastriter MW, Niemimaa J, Jarrell GH (2002) Hemoparasites and fleas of shrews and rodents from Alaska. Acta Parasitol 47:255-257
- Labunets NF (1967) Zoogeographic characteristics of the western Khangay. Proc Irkutsk State Sci Anti-Plague Inst Siberia Far East 27:231-240 (in Russian)

Leonov YA (1958) Fleas parasitic on rodents of the southern part of Primorye (Far East).

Proc Irkutsk State Sci Anti-Plague Inst Siberia Far East 17:147-152 (in Russian)

Letov GS, Emelyanova ND, Letova GI, Sulimov AD (1966) Rodents and their

ectoparasites in the settlements of Tuva. Proc Irkutsk State Sci Anti-Plague Inst

Siberia Far East 26:270-276 (in Russian)

Lindsay LR, Galloway TD (1997) Seasonal activity and temporal separation of four

species of fleas (Insecta: Siphonaptera) infesting Richardson's ground squirrels,

*Spermophilus richardsonii* (Rodentia: Sciuridae), in Manitoba, Canada. Can J Zool

75:1310-1322

Linsdale JM, Davis BS (1956) Taxonomic appraisal and occurrence of fleas at the

Hastings Reservation in Central California. Univ California Publ Zool 54:293-370

McCay TS, Durden LA (1996) Ticks and fleas of shrews in Appalachian Georgia and

North Carolina. *J Parasitol* 82:666-667

Mikulin MA (1958) Data on fleas of the Middle Asia and Kazakhstan. 5. Fleas of the

Tarbagatai. Proc Middle Asian Sci Anti-Plague Inst 4:227-240 (in Russian)

Mikulin MA (1959a) Data on fleas of the Middle Asia and Kazakhstan. 10. Fleas of the

eastern Balkhash desert, Trans-Alakul desert and Sungorian Gates. Proc Middle

Asian Sci Anti-Plague Inst 6:205-220 (in Russian)

Mikulin MA (1959b) Data on fleas of the Middle Asia and Kazakhstan. 8. Fleas of the

Akmolinsk region. Proc Middle Asian Sci Anti-Plague Inst 5:237-245 (in Russian)

Morlan HB (1955) Mammal fleas of Santa Fe County, New Mexico. Texas Rep Biol Med

13:93-125

- Morozkina EA, Lysenko LS, Kafarskaya DG (1971) Fleas of the red marmot (*Marmota caudata*) and other animals inhabiting the Gissar ridge. Problems of Particularly Dangerous Infections (The Works of Anti-Plague Establishments) 1:38-44
- Nava S, Lareschi M, Voglino D (2003) Interrelationships between ectoparasites and wild rodents from northeastern Buenos Aires province, Argentina. Mem Inst Oswaldo Cruz 98:45-49
- Nazarova IV (1981) Fleas of the Volga-Kama region. Nauka Publ House, Moscow, USSR (in Russian)
- O'Farrel TP (1975) Small mammals, their parasites and pathologic lesions of the Arid Lands Ecology Reserve, Benton County, Washington. Amer Midl Nat 93:377-387
- Paramonov BB, Emelyanova ND, Zarubina VN, Kontrimavitchus VL (1966) Materials for the study of ectoparasites of rodents and shrews of the Kamchatka peninsula. Proc Irkutsk State Sci Anti-Plague Inst Siberia Far East 26 333-341 (in Russian)
- Pauller OF, Elshanskaya NI, Shvetsova IV (1966) Ecological and faunistical review of mammalian and bird ectoparasites in the tularemia focus of the Selenga river delta. Proc Irkutsk State Sci Anti-Plague Inst Siberia Far East 26:322-332 (in Russian)
- Popova AS (1968) Flea fauna of the Moyynkum desert. In Fenyuk BK (ed) Rodents and their ectoparasites. Saratov Univ Press, Saratov, USSR, pp. 402-406 (in Russian)
- Ravkin YS, Sapegina VF (1990) Fleas of rodents of the southern taiga of Priangarje. Bull Siberian Branch Acad Sci USSR Biol Sci 3:63-68 (in Russian)
- Reshetnikova PI (1959) Flea fauna of the Kustanai region. Proc Middle Asian Sci Anti-Plague Inst 6:261-265.

- Roper TJ, Jackson TP, Conradt L, Bennett NC (2002) Burrow use and the influence of ectoparasites in Brants' whistling rat *Parotomys brantsii*. *Ethology* 108:557-564
- Sapegina VF, Yudin BS, Dudareva GV (1980a) Materials on the biology of fleas of Taimyr and Gydanskyi peninsulæ. In: Davydova MS (ed) *Parasitic insects and ticks of Siberia*. Nauka Publ House Siberian Branch, Novosibirsk, USSR, pp. 225-231 (in Russian)
- Sapegina VF, Ravkin YS, Lukyanova IV, Sebeleva GG (1980b) Fleas of the forest zone of western Siberia. In: Belyshev BV, Ravkin YS (eds) *Problems of zoogeography and faunal history*. Nauka Publ House Siberian Branch, Novosibirsk, USSR, pp. 94-166 (in Russian)
- Sapegina VF, Yudin BS, Yudina SA (1981a) Fleas of small mammals in the northern taiga of the southern Taimyr peninsula. *Bull Siberian Branch Acad Sci USSR Biol Sci* 1:96-104
- Sapegina VF, Lukyanova IV, Fomin BN (1981b) Fleas of small mammals in northern foothills of Altai Mountains and Upper Ob river region. In: Maximov AA (ed) *Biological problems of natural nidi*. Nauka Publ House Siberian Branch, Novosibirsk, USSR, pp. 167-176 (in Russian)
- Schwan TG (1986) Seasonal abundance of fleas (Siphonaptera) on grassland rodents in Lake Nakuru National Park, Kenya and potential for plague transmission. *Bull Entomol Res* 76:633-648
- Shwartz EA, Berendiaeva EL, Grebenyuk RV (1958) Fleas of rodents of the Frunze region. *Proc Middle Asian Sci Anti-Plague Inst* 4:255-261 (in Russian)

- Sineltshikov VA (1956) Study of flea fauna of the Pavlodar region. Proc Middle Asian Sci Anti-Plague Inst 2:147-153 (in Russian)
- Smit FGAM (1974) Siphonaptera collected by Dr. J. Martens in Nepal. Senckenberg Biol 55:357-398
- Starikov VP, Sapegina VF (1987) Ectoparasites of small mammals of forest-stepps Zauralje. In: Tcherepanov AI (ed) Ecology and geography of arthropods in Siberia Nauka Publ House Siberian Branch, Novosibirsk, USSR, pp. 76-83
- Syrvacheva NG (1964) Data on the flea fauna of Kabardino-Balkarian ASSR. Proc Armenian Anti-Plague Station 3:389-405 (in Russian)
- Vasiliev GI (1966) On ectoparasites and their hosts in relation to the plague epizootic in Bajan-Khongor aimak (Mongolian People Republic). Proc Irkutsk State Sci Anti-Plague Inst Siberia Far East 26:277-281 (in Russian).
- Violovich NA (1969) Landscape and geographic distribution of fleas. In: Maximov AA (ed) Biological regionalization of the Novosibirsk region. Nauka Publ House Siberian Branch, Novosibirsk, USSR, pp. 211-221 (in Russian)
- Whitaker JO Jr (1963a) Food, habitat and parasites of the woodland jumping mouse in central New York. J Mammal 44:316-321
- Whitaker JO Jr (1963b) A study of the meadow jumping mouse, *Zapus hudsonicus* (Zimmermann) in central New York. Ecol Monogr 33:215-254
- Yudin BS, Krivosheev VG, Belyaev VG (1976) Small mammals of the northern Far East. Nauka Publ House Siberian Branch, Novosibirsk, USSR (in Russian)
- Zagniborodova EN (1960) Fauna and ecology of fleas in the western Turmenistan. In: Fenyuk BK (ed) Problems of natural nidi and epizootology of plague in

Turkmenistan. Turkmenian Anti-Plague Station, All-Union Sci Anti-Plague Inst  
“Microb”, Saratov, USSR, pp. 320-334 (in Russian)
